# Supplementary material for: Downregulation of pro-surfactant protein B contributes to the recurrence of early-stage non-small cell lung cancer by activating PGK1-mediated Akt signaling
Source: Springer Nature journal article supplement (doi:10.1186/s40164-023-00455-6), 2023-11-09
Supplement: MOESM1 [file 26285242]

## Supplemental information

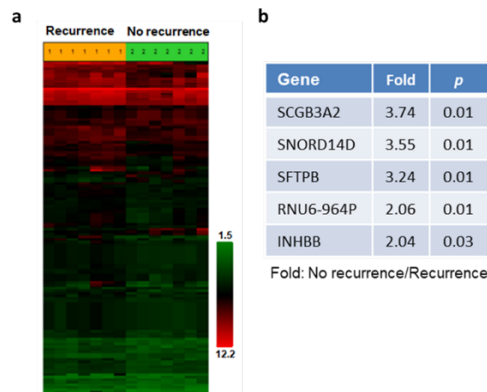

**Fig. S1** RNA sequencing analysis. **a** Heatmap showing differentially expressed genes between primary tumors of stage I lung adenocarcinoma patients with postoperative metastatic recurrence and those with no recurrence. RNA sequencing was performed using primary tumors from stage I lung adenocarcinoma patients who experienced metastatic recurrence within 24 months after the operation ( $n=7$ ) and from patients who experienced no recurrence within 60 months after the operation ( $n=7$ ). **b** Genes whose expression was significantly increased in primary tumors from stage I lung adenocarcinoma patients who had not relapsed within 24 months relative to those who had relapsed within 60 months.

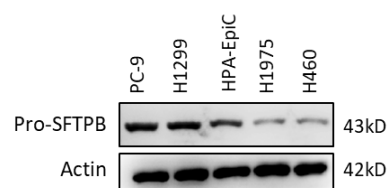

**Fig. S2** Measurement of pro-SFTPB expression in normal lung epithelial cells and NSCLC cell lines by Western blotting. HPA-EpiC, human pulmonary alveolar epithelial cell.

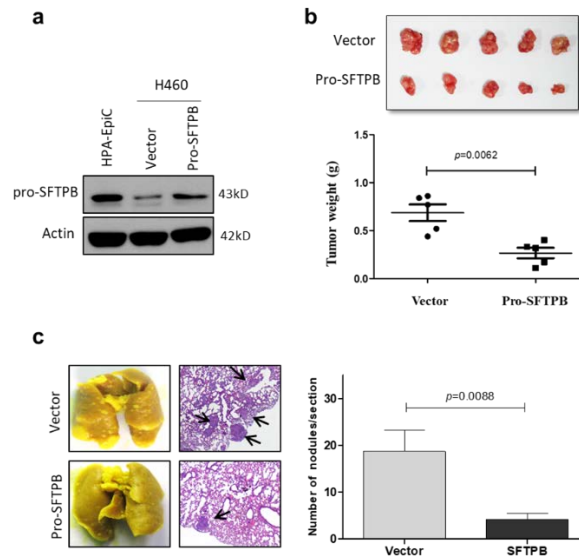

**Fig. S3** Overexpression of pro-SFTPb inhibited NSCLC progression in animal models. **a** Vector or pro-SFTPb expression plasmid was transfected into H460 cells. The expression level of pro-SFTPb was measured by Western blot in normal lung epithelial cells and H460 cells that transfected with vector or pro-SFTPb expression plasmid (after 72 hs of transfection). **b** Subcutaneous xenograft model experiment (n=5/group) showing that overexpression of pro-SFTPb inhibited tumor growth. Subcutaneously inject  $1 \times 10^7$  H460 cells in 1ml PBS into the back of each nude mouse. Tumors were collected and weighted after 1 month of cell injection. **(c)** Lung metastasis analysis showing that overexpression of pro-SFTPb expression inhibited tumor metastasis (n=5/group).  $1 \times 10^7$  H460 cells in 1ml PBS injected into each nude mouse through the tail vein. The lungs were collected after one month of cell injection, and counted the number of tumor on the surface of the lungs.

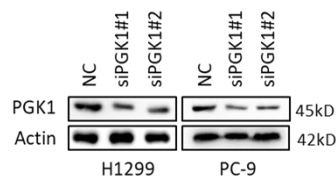

**Fig. S4** Measurement of PGK1 expression by Western blotting. H1299 and PC-9 cells were transfected with siRNAs against PGK1. The cells were subjected to Western blotting 72 h after transfection.

**Table S1. Proteins affected by pro-SFTPb silencing**

| Gene Name    | Description                                                                             | Average Scramble | Average sh pro-SFTPb | Scramble/sh pro-SFTPb | P value  |
|--------------|-----------------------------------------------------------------------------------------|------------------|----------------------|-----------------------|----------|
| DKFZp761K058 | Putative uncharacterized protein DKFZp761K058 OS=Homo sapiens GN=DKFZp761K058 PE=2 SV=2 | 29.2             | 148.6                | 5.0890411             | 3.48E-09 |
| RRBP1        | RRBP1 protein OS=Homo sapiens GN=RRBP1 PE=2 SV=1                                        | 31.65            | 142.7                | 4.5086888             | 4.44E-08 |
| CRIP1        | Cysteine-rich protein 1 OS=Homo sapiens GN=CRIP1 PE=1 SV=3                              | 33               | 134.05               | 4.0621212             | 3.43E-07 |
| ALDH1A1      | Retinal dehydrogenase 1 OS=Homo sapiens GN=ALDH1A1 PE=1 SV=2                            | 34.5             | 134.9                | 3.9101449             | 7.01E-07 |
| BASP1        | Brain acid soluble protein 1 OS=Homo sapiens GN=BASP1 PE=1 SV=2                         | 39.75            | 147.15               | 3.7018868             | 1.89E-06 |
| SLC39A8      | Zinc transporter ZIP8 OS=Homo sapiens GN=SLC39A8 PE=2 SV=1                              | 44.4             | 164.15               | 3.6970721             | 1.94E-06 |
| KIAA1609     | KIAA1609 protein, isoform CRA_a OS=Homo sapiens GN=KIAA1609 PE=4 SV=1                   | 38.75            | 137.7                | 3.5535484             | 3.88E-06 |
| AKR1B10      | Aldo-keto reductase family 1 member B10 OS=Homo sapiens GN=AKR1B10 PE=1 SV=2            | 36.95            | 129.9                | 3.5155616             | 4.67E-06 |
| PGK1         | Phosphoglycerate kinase 1 OS=Homo sapiens GN=PGK1 PE=1 SV=3                             | 39.35            | 136.5                | 3.4688691             | 5.86E-06 |
| KRT7         | Keratin, type II cytoskeletal 7 OS=Homo sapiens GN=KRT7 PE=1 SV=5                       | 39.35            | 135.15               | 3.4345616             | 6.94E-06 |
| CPLX2        | Complexin-2 OS=Homo sapiens GN=CPLX2 PE=2 SV=2                                          | 39.35            | 132.1                | 3.3570521             | 1.02E-05 |
| ALDH3A1      | Aldehyde dehydrogenase, dimeric NADP-preferring OS=Homo sapiens                         | 38.35            | 127.95               | 3.3363755             | 1.13E-05 |

|          |                                                                                     |       |        |               |                 |
|----------|-------------------------------------------------------------------------------------|-------|--------|---------------|-----------------|
|          | GN=ALDH3A1 PE=1 SV=3                                                                |       |        |               |                 |
| KYNU     | Kynureninase OS=Homo sapiens GN=KYNU PE=1 SV=1                                      | 42.15 | 137.5  | 3.262159      | 1.63E-05        |
| UCHL1    | Ubiquitin carboxyl-terminal hydrolase isozyme L1 OS=Homo sapiens GN=UCHL1 PE=1 SV=2 | 42.3  | 136.1  | 3.217494<br>1 | 2.03E-05        |
| S100P    | Protein S100-P OS=Homo sapiens GN=S100P PE=1 SV=2                                   | 42.4  | 134.9  | 3.181603<br>8 | 2.43E-05        |
| HIST1H1D | Histone H1.3 OS=Homo sapiens GN=HIST1H1D PE=1 SV=2                                  | 46.6  | 145    | 3.111588      | 3.46E-05        |
| AKR1B1   | Aldose reductase OS=Homo sapiens GN=AKR1B1 PE=1 SV=3                                | 42.7  | 131.05 | 3.069086<br>7 | 4.28E-05        |
| YBEY     | Putative ribonuclease OS=Homo sapiens GN=YBEY PE=1 SV=2                             | 43.35 | 128.4  | 2.961937<br>7 | 7.37E-05        |
| CA12     | Carbonic anhydrase 12 OS=Homo sapiens GN=CA12 PE=1 SV=1                             | 44.5  | 130    | 2.921348<br>3 | 9.06E-05        |
| PLSCR1   | Phospholipid scramblase 1 OS=Homo sapiens GN=PLSCR1 PE=1 SV=1                       | 50.45 | 145.25 | 2.879088<br>2 | 0.0001123<br>75 |
| ANXA4    | Annexin (Fragment) OS=Homo sapiens GN=ANXA4 PE=2 SV=1                               | 46.95 | 134.15 | 2.857295      | 0.0001256<br>09 |
| HLA-B    | MHC class I antigen (Fragment) OS=Homo sapiens GN=HLA-B PE=3 SV=1                   | 50.45 | 143.75 | 2.849355<br>8 | 0.0001308<br>13 |
| ASB9     | Ankyrin repeat and SOCS box protein 9 OS=Homo sapiens GN=ASB9 PE=1 SV=1             | 46.75 | 132.35 | 2.831016      | 0.0001436<br>82 |
| AKR1C3   | Aldo-keto reductase family 1 member C3 OS=Homo sapiens GN=AKR1C3 PE=1 SV=1          | 45.25 | 127.4  | 2.815469<br>6 | 0.0001555<br>9  |
| AGR2     | AGR2 OS=Homo sapiens GN=AGR2 PE=4 SV=1                                              | 48.85 | 137    | 2.804503<br>6 | 0.0001645<br>85 |
| PTGFRN   | Prostaglandin F2 receptor                                                           | 48.35 | 134.8  | 2.788004      | 0.0001791       |

|          |                                                                                                                              |       |        |               |                 |
|----------|------------------------------------------------------------------------------------------------------------------------------|-------|--------|---------------|-----------------|
|          | negative regulator<br>OS=Homo sapiens<br>GN=PTGFRN PE=1 SV=2                                                                 |       |        | 1             | 19              |
| HLA-C    | MHC class I antigen<br>(Fragment) OS=Homo sapiens<br>GN=HLA-C PE=3 SV=1                                                      | 41.65 | 116    | 2.785114      | 0.0001817<br>95 |
| ALDH3A2  | Fatty aldehyde dehydrogenase<br>OS=Homo sapiens GN=ALDH3A2<br>PE=1 SV=1                                                      | 44.9  | 124.25 | 2.767260<br>6 | 0.0001992<br>46 |
| SLC23A2  | Solute carrier family 23<br>(Nucleobase transporters),<br>member 2, isoform CRA_a<br>OS=Homo sapiens<br>GN=SLC23A2 PE=4 SV=1 | 48.35 | 132.65 | 2.743536<br>7 | 0.0002250<br>84 |
| NQO1     | NAD(P)H dehydrogenase<br>[quinone] 1 OS=Homo sapiens<br>GN=NQO1 PE=1 SV=1                                                    | 47.7  | 129.2  | 2.708595<br>4 | 0.0002694<br>32 |
| S100A6   | Protein S100-A6<br>OS=Homo sapiens<br>GN=S100A6 PE=1 SV=1                                                                    | 48.5  | 131.1  | 2.703092<br>8 | 0.0002771<br>79 |
| SQOR     | Sulfide:quinone oxidoreductase,<br>mitochondrial OS=Homo sapiens<br>GN=SQOR PE=1 SV=1                                        | 47.1  | 127.15 | 2.699575<br>4 | 0.0002822<br>49 |
| SELENOI  | Ethanolaminephosphotransferase 1<br>OS=Homo sapiens<br>GN=SELENOI PE=1 SV=3                                                  | 49.2  | 131.95 | 2.681910<br>6 | 0.0003091<br>6  |
| C15orf48 | Chromosome 15 open reading frame 48, isoform<br>CRA_a OS=Homo sapiens<br>GN=C15orf48 PE=4 SV=1                               | 52.85 | 140.8  | 2.664143<br>8 | 0.0003388<br>39 |
| PON3     | Serum paraoxonase/lactonase 3<br>OS=Homo sapiens<br>GN=PON3 PE=1 SV=3                                                        | 48.05 | 127.05 | 2.644120<br>7 | 0.0003757<br>48 |
| SPDEF    | SAM pointed domain-containing<br>Ets transcription factor OS=Homo sapiens<br>GN=SPDEF PE=1 SV=1                              | 40.45 | 106.85 | 2.641532<br>8 | 0.0003808<br>05 |
| COX2     | Cytochrome c oxidase                                                                                                         | 45.1  | 118.55 | 2.628603      | 0.0004071       |

|         |                                                                                                            |       |        |           |             |
|---------|------------------------------------------------------------------------------------------------------------|-------|--------|-----------|-------------|
|         | subunit 2 OS=Homo sapiens GN=COX2 PE=3 SV=1                                                                |       |        | 1         | 18          |
| UGDH    | UDP-glucose 6-dehydrogenase OS=Homo sapiens GN=UGDH PE=1 SV=1                                              | 47.95 | 125.95 | 2.6266945 | 0.000411155 |
| SULT1A4 | Sulfotransferase OS=Homo sapiens GN=SULT1A4 PE=1 SV=1                                                      | 52.45 | 137.4  | 2.6196378 | 0.000426433 |
| AKR1C1  | Aldo-keto reductase family 1 member C1 (Fragment) OS=Homo sapiens GN=AKR1C1 PE=1 SV=1                      | 42.4  | 110.05 | 2.5955189 | 0.000483103 |
| HDHD3   | Haloacid dehalogenase-like hydrolase domain containing 3, isoform CRA_a OS=Homo sapiens GN=HDHD3 PE=4 SV=1 | 47    | 121.95 | 2.5946809 | 0.000485203 |
| SHMT1   | Serine hydroxymethyltransferase, cytosolic OS=Homo sapiens GN=SHMT1 PE=1 SV=1                              | 52.25 | 134.7  | 2.5779904 | 0.000528995 |
| CREB1   | cAMP responsive element binding protein 1 OS=Homo sapiens GN=CREB1 PE=2 SV=1                               | 49.45 | 126.3  | 2.554095  | 0.000598713 |
| AKR1C2  | Aldo-keto reductase family 1 member C2 OS=Homo sapiens GN=AKR1C2 PE=1 SV=3                                 | 46.4  | 118.45 | 2.5528017 | 0.00060274  |
| HEXB    | Beta-hexosaminidase subunit beta OS=Homo sapiens GN=HEXB PE=1 SV=3                                         | 49.25 | 125.55 | 2.5492386 | 0.000613975 |
| S100A3  | Protein S100-A3 OS=Homo sapiens GN=S100A3 PE=1 SV=1                                                        | 50.9  | 127.35 | 2.5019646 | 0.000784617 |
| LXN     | Latexin OS=Homo sapiens GN=LXN PE=1 SV=2                                                                   | 49.05 | 121.8  | 2.4831804 | 0.000865001 |
| LYST    | Lysosomal-traffic regulator OS=Homo sapiens GN=LYST PE=1                                                   | 60.3  | 149.7  | 2.4825871 | 0.000867671 |

|         |                                                                                                |       |        |           |             |
|---------|------------------------------------------------------------------------------------------------|-------|--------|-----------|-------------|
|         | SV=3                                                                                           |       |        |           |             |
| CEACAM6 | Carcinoembryonic antigen-related cell adhesion molecule 6 OS=Homo sapiens GN=CEACAM6 PE=1 SV=3 | 51.15 | 126.65 | 2.4760508 | 0.000897635 |
| TNFAIP2 | Tumor necrosis factor alpha-induced protein 2 OS=Homo sapiens GN=TNFAIP2 PE=2 SV=2             | 56.75 | 138.95 | 2.4484581 | 0.00103602  |
| POF1B   | Protein POF1B OS=Homo sapiens GN=POF1B PE=1 SV=3                                               | 56.4  | 137.4  | 2.4361702 | 0.00110436  |
| MGST1   | Microsomal glutathione S-transferase 1 OS=Homo sapiens GN=MGST1 PE=1 SV=1                      | 52.6  | 124.9  | 2.3745247 | 0.00152185  |
| CENPV   | Centromere protein V OS=Homo sapiens GN=CENPV PE=1 SV=1                                        | 52.25 | 123.85 | 2.3703349 | 0.0015554   |
| ME1     | NADP-dependent malic enzyme OS=Homo sapiens GN=ME1 PE=1 SV=1                                   | 47.95 | 113.65 | 2.3701773 | 0.00155667  |
| GPRC5C  | G-protein-coupled receptor family C group 5 member C OS=Homo sapiens GN=GPRC5C PE=1 SV=1       | 50.65 | 119.9  | 2.3672261 | 0.00158076  |
| LDHD    | Probable D-lactate dehydrogenase, mitochondrial OS=Homo sapiens GN=LDHD PE=1 SV=1              | 48    | 113.6  | 2.3666667 | 0.00158537  |
| TXN     | Thioredoxin OS=Homo sapiens GN=TXN PE=2 SV=1                                                   | 56.55 | 133.7  | 2.3642794 | 0.00160519  |
| GALM    | Aldose 1-epimerase OS=Homo sapiens GN=GALM PE=1 SV=1                                           | 51.95 | 122.6  | 2.3599615 | 0.00164167  |
| CXCL5   | C-X-C motif chemokine 5 OS=Homo sapiens GN=CXCL5 PE=1 SV=1                                     | 63.75 | 150.35 | 2.3584314 | 0.0016548   |
| PBEF1   | Pre-B-cell colony enhancing factor 1, isoform                                                  | 58.5  | 137.55 | 2.3512821 | 0.00171754  |

|          |                                                                                                             |       |        |               |                |
|----------|-------------------------------------------------------------------------------------------------------------|-------|--------|---------------|----------------|
|          | CRA_a OS=Homo sapiens<br>GN=PBEF1 PE=4 SV=1                                                                 |       |        |               |                |
| HEL107   | Epididymis luminal protein<br>107 OS=Homo sapiens<br>GN=HEL107 PE=2 SV=1                                    | 53.8  | 126.25 | 2.346654<br>3 | 0.0017594<br>1 |
| RNF13    | E3 ubiquitin-protein ligase<br>RNF13 OS=Homo sapiens<br>GN=RNF13 PE=1 SV=1                                  | 58.6  | 137.1  | 2.339590<br>4 | 0.0018253<br>1 |
| CBR1     | Carbonyl reductase<br>[NADPH] 1 OS=Homo sapiens<br>GN=CBR1 PE=1 SV=3                                        | 51.25 | 119.5  | 2.331707<br>3 | 0.0019017<br>7 |
| MARCKS   | Myristoylated alanine-rich<br>C-kinase substrate<br>OS=Homo sapiens<br>GN=MARCKS PE=1 SV=4                  | 60.7  | 141.2  | 2.326194<br>4 | 0.0019571<br>4 |
| CEACAM1  | Carcinoembryonic antigen-<br>related cell adhesion<br>molecule 1 OS=Homo sapiens<br>GN=CEACAM1<br>PE=1 SV=2 | 54.3  | 124.75 | 2.297421<br>7 | 0.0022733<br>7 |
| PTGR1    | Prostaglandin reductase 1<br>OS=Homo sapiens<br>GN=PTGR1 PE=1 SV=2                                          | 52.75 | 120.3  | 2.280568<br>7 | 0.0024818<br>3 |
| LCN2     | Neutrophil gelatinase-<br>associated lipocalin<br>OS=Homo sapiens<br>GN=LCN2 PE=1 SV=1                      | 61.95 | 141.05 | 2.276836<br>2 | 0.0025305<br>2 |
| IGF2BP1  | Insulin-like growth factor 2<br>mRNA-binding protein 1<br>OS=Homo sapiens<br>GN=IGF2BP1 PE=1 SV=2           | 56.25 | 128.05 | 2.276444<br>4 | 0.0025356<br>9 |
| SARCOSIN | Sarcomeric muscle protein<br>(Fragment) OS=Homo sapiens<br>GN=SARCOSIN<br>PE=2 SV=1                         | 49.8  | 113.1  | 2.271084<br>3 | 0.0026074<br>3 |
| ADD2     | Beta-adducin OS=Homo sapiens<br>GN=ADD2 PE=1 SV=3                                                           | 44.7  | 101.45 | 2.269574<br>9 | 0.002628       |
| MYOF     | Myoferlin OS=Homo sapiens<br>GN=MYOF PE=1 SV=1                                                              | 58.7  | 133.05 | 2.266609<br>9 | 0.0026688<br>7 |
| SDCBP    | Syntenin-1 OS=Homo sapiens<br>GN=SDCBP PE=1                                                                 | 59.8  | 135.4  | 2.264214      | 0.0027023<br>6 |



|          |                                                                                                      |       |        |               |                |
|----------|------------------------------------------------------------------------------------------------------|-------|--------|---------------|----------------|
|          | SV=1                                                                                                 |       |        |               |                |
| PON2     | Paraoxonase 2, isoform<br>CRA_a OS=Homo sapiens<br>GN=PON2 PE=1 SV=1                                 | 56.95 | 127.8  | 2.244073<br>7 | 0.0030010<br>1 |
| EPHX1    | Epoxide hydrolase<br>OS=Homo sapiens<br>GN=EPHX1 PE=2 SV=1                                           | 52.25 | 117.05 | 2.240191<br>4 | 0.0030622<br>6 |
| PIR      | Pirin OS=Homo sapiens<br>GN=PIR PE=1 SV=1                                                            | 50.45 | 112.85 | 2.236868<br>2 | 0.0031156<br>8 |
| FEZ2     | Fasciculation and<br>elongation protein zeta-2<br>(Fragment) OS=Homo<br>sapiens GN=FEZ2 PE=1<br>SV=1 | 48.6  | 108.55 | 2.233539<br>1 | 0.0031701<br>2 |
| TMEM106B | TMEM106B protein<br>(Fragment) OS=Homo<br>sapiens GN=TMEM106B<br>PE=2 SV=1                           | 56.8  | 125.95 | 2.217429<br>6 | 0.0034472<br>7 |
| FAM213A  | Redox-regulatory protein<br>FAM213A OS=Homo<br>sapiens GN=FAM213A<br>PE=1 SV=3                       | 58.45 | 129.45 | 2.214713<br>4 | 0.0034963<br>3 |
| NCSTN    | Nicastrin OS=Homo<br>sapiens GN=NCSTN PE=1<br>SV=2                                                   | 57.7  | 127.6  | 2.211438<br>5 | 0.0035564      |
| CTSS     | Cathepsin S OS=Homo<br>sapiens GN=CTSS PE=1<br>SV=3                                                  | 61.2  | 135.25 | 2.209967<br>3 | 0.0035837<br>2 |
| TSPAN15  | Tetraspanin-15 OS=Homo<br>sapiens GN=TSPAN15<br>PE=1 SV=1                                            | 58.4  | 128.6  | 2.202054<br>8 | 0.0037342<br>9 |
| SRC      | Proto-oncogene tyrosine-<br>protein kinase Src<br>OS=Homo sapiens<br>GN=SRC PE=1 SV=3                | 57.15 | 125.25 | 2.191601      | 0.0039429<br>1 |
| AHR      | Aryl hydrocarbon receptor,<br>isoform CRA_a OS=Homo<br>sapiens GN=AHR PE=4<br>SV=1                   | 57.9  | 125.3  | 2.164076      | 0.0045494      |
| CAST     | Calpastatin (Fragment)<br>OS=Homo sapiens<br>GN=CAST PE=1 SV=1                                       | 57.75 | 124.45 | 2.154978<br>4 | 0.0047696      |
| ICAM1    | Intercellular adhesion<br>molecule 1 OS=Homo                                                         | 61.75 | 133    | 2.153846<br>2 | 0.0047977<br>3 |

|          |                                                                                                                                          |       |        |               |                |
|----------|------------------------------------------------------------------------------------------------------------------------------------------|-------|--------|---------------|----------------|
|          | sapiens GN=ICAM1 PE=1<br>SV=2                                                                                                            |       |        |               |                |
| SLC16A3  | Solute carrier family 16<br>(Monocarboxylic acid<br>transporters), member 3,<br>isoform CRA_a OS=Homo<br>sapiens GN=SLC16A3 PE=4<br>SV=1 | 60.3  | 129.5  | 2.147595<br>4 | 0.0049560<br>7 |
| ADIG     | Adipogenin (Fragment)<br>OS=Homo sapiens<br>GN=ADIG PE=4 SV=1                                                                            | 56.55 | 121.4  | 2.146772<br>8 | 0.0049772<br>8 |
| ALDH2    | Aldehyde dehydrogenase,<br>mitochondrial OS=Homo<br>sapiens GN=ALDH2 PE=1<br>SV=2                                                        | 55.3  | 118.35 | 2.140144<br>7 | 0.0051515<br>9 |
| C19orf70 | MICOS complex subunit<br>MIC13 OS=Homo sapiens<br>GN=C19orf70 PE=1 SV=1                                                                  | 58.25 | 124.4  | 2.135622<br>3 | 0.0052739<br>8 |
| HLA-A    | MHC class I antigen<br>(Fragment) OS=Homo<br>sapiens GN=HLA-A PE=3<br>SV=1                                                               | 62.4  | 132.9  | 2.129807<br>7 | 0.0054356      |
| NRAP     | Nebulin-related-anchoring<br>protein OS=Homo sapiens<br>GN=NRAP PE=1 SV=1                                                                | 65.1  | 138.45 | 2.126728<br>1 | 0.0055231<br>8 |
| MRPL51   | 39S ribosomal protein L51,<br>mitochondrial OS=Homo<br>sapiens GN=MRPL51 PE=1<br>SV=1                                                    | 63.75 | 135.5  | 2.125490<br>2 | 0.0055587<br>8 |
| DPP3     | Dipeptidyl peptidase 3<br>OS=Homo sapiens<br>GN=DPP3 PE=1 SV=2                                                                           | 58.55 | 124.15 | 2.120409<br>9 | 0.0057072<br>8 |
| FDFT1    | Squalene synthase<br>OS=Homo sapiens<br>GN=FDFT1 PE=1 SV=1                                                                               | 61    | 129.15 | 2.117213<br>1 | 0.0058027<br>4 |
| RBM47    | RNA-binding protein 47<br>OS=Homo sapiens<br>GN=RBM47 PE=1 SV=2                                                                          | 55.2  | 116.65 | 2.113224<br>6 | 0.0059240<br>5 |
| TNFSF13B | Tumor necrosis factor<br>ligand superfamily member<br>13B OS=Homo sapiens<br>GN=TNFSF13B PE=1 SV=1                                       | 61.35 | 128.95 | 2.101874<br>5 | 0.0062832<br>4 |
| EVPL     | EVPL protein OS=Homo<br>sapiens GN=EVPL PE=2                                                                                             | 56.15 | 117.55 | 2.093499<br>6 | 0.0065620<br>5 |

|          |                                                                            |       |        |               |                |
|----------|----------------------------------------------------------------------------|-------|--------|---------------|----------------|
|          | SV=1                                                                       |       |        |               |                |
| KRT8     | Keratin, type II cytoskeletal 8 OS=Homo sapiens GN=KRT8 PE=1 SV=7          | 58    | 121.05 | 2.087069      | 0.0067844<br>2 |
| TARBP1   | Probable methyltransferase TARBP1 OS=Homo sapiens GN=TARBP1 PE=1 SV=1      | 63.35 | 132.15 | 2.08603       | 0.0068210<br>5 |
| ARL8A    | ADP-ribosylation factor-like protein 8A OS=Homo sapiens GN=ARL8A PE=1 SV=1 | 58.1  | 121.05 | 2.083476<br>8 | 0.0069118<br>8 |
| CELF2    | CUGBP Elav-like family member 2 OS=Homo sapiens GN=CELF2 PE=1 SV=1         | 59.5  | 123.85 | 2.081512<br>6 | 0.0069825<br>7 |
| RPL14    | RPL14 protein OS=Homo sapiens GN=RPL14 PE=1 SV=1                           | 59.5  | 123.65 | 2.078151<br>3 | 0.0071052<br>2 |
| GPI      | Glucose-6-phosphate isomerase (Fragment) OS=Homo sapiens GN=GPI PE=1 SV=1  | 61    | 126.75 | 2.077868<br>9 | 0.0071156<br>1 |
| TBC1D8   | TBC1 domain family member 8 OS=Homo sapiens GN=TBC1D8 PE=1 SV=1            | 63.85 | 131.85 | 2.064996<br>1 | 0.0076060<br>6 |
| HEL-S-45 | Epididymis secretory protein Li 45 OS=Homo sapiens GN=HEL-S-45 PE=2 SV=1   | 61.45 | 126.75 | 2.062652<br>6 | 0.0076988<br>7 |
| EPB41L1  | Band 4.1-like protein 1 OS=Homo sapiens GN=EPB41L1 PE=1 SV=2               | 59.4  | 122.35 | 2.059764<br>3 | 0.0078148<br>1 |
| PLS3     | Plastin-3 OS=Homo sapiens GN=PLS3 PE=1 SV=4                                | 61    | 124.9  | 2.047541      | 0.0083249<br>1 |
| ADSSL1   | Adenylosuccinate synthetase isozyme 1 OS=Homo sapiens GN=ADSSL1 PE=1 SV=1  | 52.05 | 106.3  | 2.042267<br>1 | 0.0085550<br>5 |
| RAB27B   | Ras-related protein Rab-27B OS=Homo sapiens GN=RAB27B PE=1 SV=4            | 64.9  | 132.4  | 2.040061<br>6 | 0.0086531<br>3 |
| CEACAM7  | Carcinoembryonic antigen-                                                  | 60.4  | 121.5  | 2.011589      | 0.0100238      |

|           |                                                                                           |        |        |           |            |
|-----------|-------------------------------------------------------------------------------------------|--------|--------|-----------|------------|
|           | related cell adhesion molecule 7 OS=Homo sapiens GN=CEACAM7 PE=1 SV=1                     |        |        | 4         |            |
| CDIPT     | CDP-diacylglycerol--inositol 3-phosphatidyltransferase OS=Homo sapiens GN=CDIPT PE=1 SV=1 | 59.65  | 119.85 | 2.0092205 | 0.0101471  |
| ACTR10    | Actin-related protein 10 (Fragment) OS=Homo sapiens GN=ACTR10 PE=1 SV=1                   | 61.7   | 123.65 | 2.0040519 | 0.0104213  |
| LMBRD1    | Probable lysosomal cobalamin transporter OS=Homo sapiens GN=LMBRD1 PE=1 SV=1              | 59.45  | 119    | 2.0016821 | 0.0105494  |
| HEL-S-265 | Epididymis secretory protein Li 265 OS=Homo sapiens GN=HEL-S-265 PE=2 SV=1                | 150.45 | 75.6   | 0.5024925 | 0.00413926 |
| PKP2      | Plakophilin-2 OS=Homo sapiens GN=PKP2 PE=1 SV=2                                           | 144.65 | 72.55  | 0.5015555 | 0.00403594 |
| SMARCA4   | Transcription activator BRG1 OS=Homo sapiens GN=SMARCA4 PE=1 SV=1                         | 150.35 | 75.3   | 0.5008314 | 0.00395757 |
| TK1       | Thymidine kinase OS=Homo sapiens GN=TK1 PE=1 SV=1                                         | 143.25 | 71.2   | 0.4970332 | 0.00356702 |
| MCM5      | DNA helicase OS=Homo sapiens GN=MCM5 PE=2 SV=1                                            | 148.6  | 73.85  | 0.4969717 | 0.00356098 |
| TSPYL1    | Testis-specific Y-encoded-like protein 1 OS=Homo sapiens GN=TSPYL1 PE=1 SV=3              | 142.6  | 70.8   | 0.4964937 | 0.00351426 |
| MAGED2    | Melanoma antigen family D, 2, isoform CRA_a OS=Homo sapiens GN=MAGED2 PE=4 SV=1           | 147.7  | 73.3   | 0.4962762 | 0.00349317 |
| DDX21     | Nucleolar RNA helicase 2 OS=Homo sapiens GN=DDX21 PE=1 SV=5                               | 146    | 72.3   | 0.4952055 | 0.00339091 |

|          |                                                                                                                                 |        |       |               |                |
|----------|---------------------------------------------------------------------------------------------------------------------------------|--------|-------|---------------|----------------|
| A2M      | Alpha-2-macroglobulin<br>OS=Homo sapiens<br>GN=A2M PE=1 SV=3                                                                    | 146.5  | 72.2  | 0.492832<br>8 | 0.0031732      |
| OXCT1    | Succinyl-CoA:3-ketoacid<br>coenzyme A transferase 1,<br>mitochondrial OS=Homo<br>sapiens GN=OXCT1 PE=1<br>SV=1                  | 148.55 | 72.85 | 0.490407<br>3 | 0.0029628<br>9 |
| LIG1     | DNA ligase 1 OS=Homo<br>sapiens GN=LIG1 PE=1<br>SV=1                                                                            | 144.05 | 70.5  | 0.489413<br>4 | 0.0028801<br>7 |
| RCN3     | Reticulocalbin-3 OS=Homo<br>sapiens GN=RCN3 PE=1<br>SV=1                                                                        | 147.35 | 72.1  | 0.489311<br>2 | 0.0028717<br>7 |
| FBXO30   | F-box only protein 30<br>OS=Homo sapiens<br>GN=FBXO30 PE=1 SV=3                                                                 | 156.05 | 76.35 | 0.489266<br>3 | 0.0028680<br>9 |
| EPB41L2  | Band 4.1-like protein 2<br>OS=Homo sapiens<br>GN=EPB41L2 PE=1 SV=1                                                              | 148.3  | 72.5  | 0.488873<br>9 | 0.0028360<br>8 |
| MAP3K4   | Mitogen-activated protein<br>kinase kinase kinase 4<br>OS=Homo sapiens<br>GN=MAP3K4 PE=1 SV=2                                   | 138.05 | 67.3  | 0.487504<br>5 | 0.0027267<br>3 |
| MT2A     | Metallothionein-2<br>OS=Homo sapiens<br>GN=MT2A PE=1 SV=1                                                                       | 156    | 75.45 | 0.483653<br>8 | 0.0024380<br>8 |
| FHL3     | Four and a half LIM<br>domains protein 3<br>OS=Homo sapiens<br>GN=FHL3 PE=1 SV=4                                                | 148.8  | 71.95 | 0.483534<br>9 | 0.0024296      |
| KHDRBS3  | KH domain-containing,<br>RNA-binding, signal<br>transduction-associated<br>protein 3 OS=Homo<br>sapiens GN=KHDRBS3<br>PE=1 SV=1 | 152    | 73.3  | 0.482236<br>8 | 0.0023385<br>7 |
| HEL-S-69 | Epididymis secretory<br>protein Li 69 OS=Homo<br>sapiens GN=HEL-S-69<br>PE=1 SV=1                                               | 155.05 | 74.65 | 0.481457<br>6 | 0.0022853<br>3 |
| MTHFD2   | Bifunctional<br>methylenetetrahydrofolate<br>dehydrogenase/cyclohydro                                                           | 141.3  | 67.95 | 0.480891<br>7 | 0.0022473<br>1 |

|                  |                                                                                                           |        |       |           |             |
|------------------|-----------------------------------------------------------------------------------------------------------|--------|-------|-----------|-------------|
|                  | lase, mitochondrial<br>OS=Homo sapiens<br>GN=MTHFD2 PE=1 SV=2                                             |        |       |           |             |
| CTPS1            | CTP synthase 1 OS=Homo sapiens<br>GN=CTPS1 PE=1 SV=2                                                      | 150.6  | 71.95 | 0.4777556 | 0.00204618  |
| HEL-S-277        | DDAH2 OS=Homo sapiens<br>GN=HEL-S-277 PE=1 SV=1                                                           | 150.75 | 72    | 0.4776119 | 0.00203734  |
| TPM2b            | Beta tropomyosin isoform<br>OS=Homo sapiens<br>GN=TPM2b PE=2 SV=1                                         | 157.2  | 74.6  | 0.4745547 | 0.00185684  |
| RANBP1           | RAN binding protein 1, isoform CRA_g OS=Homo sapiens<br>GN=RANBP1 PE=2 SV=1                               | 154.9  | 73.4  | 0.4738541 | 0.00181744  |
| CRMP1            | Dihydropyrimidinase-related protein 1<br>OS=Homo sapiens<br>GN=CRMP1 PE=1 SV=1                            | 144.9  | 68.65 | 0.473775  | 0.00181304  |
| HIST1H1C         | Histone H1.2 OS=Homo sapiens<br>GN=HIST1H1C PE=1 SV=2                                                     | 160.85 | 76    | 0.4724899 | 0.00174277  |
| hCG_28765        | HCG28765, isoform CRA_b OS=Homo sapiens<br>GN=hCG_28765 PE=4 SV=1                                         | 152.9  | 71.95 | 0.470569  | 0.00164207  |
| AHNAK            | Neuroblast differentiation-associated protein AHNAK<br>OS=Homo sapiens<br>GN=AHNAK PE=1 SV=2              | 155.75 | 73.25 | 0.470305  | 0.00162862  |
| HLA-B            | MHC class I antigen<br>OS=Homo sapiens<br>GN=HLA-B PE=3 SV=1                                              | 158.4  | 73.8  | 0.4659091 | 0.00141815  |
| SDC4-ROS1_S4;R32 | Tyrosine-protein kinase receptor OS=Homo sapiens<br>GN=SDC4-ROS1_S4;R32 PE=2 SV=1                         | 144.4  | 66    | 0.4570637 | 0.00106419  |
| CLN6             | Ceroid-lipofuscinosis neuronal 6 late infantile variant isoform 1<br>OS=Homo sapiens<br>GN=CLN6 PE=2 SV=1 | 152.1  | 69.5  | 0.4569362 | 0.0010597   |
| TUBA2            | Tubulin alpha chain<br>OS=Homo sapiens                                                                    | 157.25 | 71.35 | 0.4537361 | 0.000952265 |

|        |                                                                                                  |        |       |           |             |
|--------|--------------------------------------------------------------------------------------------------|--------|-------|-----------|-------------|
|        | GN=TUBA2 PE=2 SV=1                                                                               |        |       |           |             |
| SH3BP1 | SH3 domain-binding protein 1 OS=Homo sapiens GN=SH3BP1 PE=1 SV=3                                 | 152.7  | 69.15 | 0.4528487 | 0.000924188 |
| NASP   | Nuclear autoantigenic sperm protein OS=Homo sapiens GN=NASP PE=1 SV=2                            | 154.75 | 70    | 0.4523425 | 0.000908492 |
| MAGEA1 | Melanoma-associated antigen 1 OS=Homo sapiens GN=MAGEA1 PE=1 SV=1                                | 163.85 | 74.05 | 0.4519377 | 0.00089611  |
| IMPDH2 | Inosine-5'-monophosphate dehydrogenase 2 OS=Homo sapiens GN=IMPDH2 PE=1 SV=2                     | 154.7  | 69.9  | 0.4518423 | 0.00089321  |
| DUT    | Deoxyuridine 5'-triphosphate nucleotidohydrolase, mitochondrial OS=Homo sapiens GN=DUT PE=1 SV=4 | 153.5  | 69.25 | 0.4511401 | 0.000872131 |
| TOP2A  | DNA topoisomerase 2-alpha OS=Homo sapiens GN=TOP2A PE=1 SV=3                                     | 149.35 | 67    | 0.4486106 | 0.000799713 |
| EPHA2  | Ephrin type-A receptor 2 OS=Homo sapiens GN=EPHA2 PE=1 SV=2                                      | 155.55 | 69.7  | 0.4480874 | 0.0007854   |
| PAGE2B | Putative G antigen family E member 3 OS=Homo sapiens GN=PAGE2B PE=3 SV=1                         | 154.55 | 69.15 | 0.447428  | 0.000767676 |
| TAGLN  | Transgelin OS=Homo sapiens GN=TAGLN PE=2 SV=1                                                    | 159.2  | 71.05 | 0.446294  | 0.000738003 |
| UBE2S  | Ubiquitin-conjugating enzyme E2 S OS=Homo sapiens GN=UBE2S PE=1 SV=2                             | 154.9  | 68.5  | 0.4422208 | 0.000639447 |
| RRM2B  | Ribonucleoside-diphosphate reductase subunit M2 B (Fragment)                                     | 156.7  | 69.25 | 0.4419272 | 0.000632808 |

|         |                                                                                                        |        |       |               |                 |
|---------|--------------------------------------------------------------------------------------------------------|--------|-------|---------------|-----------------|
|         | OS=Homo sapiens<br>GN=RRM2B PE=1 SV=1                                                                  |        |       |               |                 |
| PTGFRN  | PTGFRN protein (Fragment)<br>OS=Homo sapiens<br>GN=PTGFRN PE=2 SV=1                                    | 161.9  | 70.6  | 0.436071<br>6 | 0.0005122<br>88 |
| PBK     | Lymphokine-activated killer<br>T-cell-originated protein<br>kinase OS=Homo sapiens<br>GN=PBK PE=1 SV=3 | 157.5  | 68.6  | 0.435555<br>6 | 0.0005026<br>93 |
| FSCN1   | Fascin OS=Homo sapiens<br>GN=FSCN1 PE=1 SV=3                                                           | 160.7  | 69.4  | 0.431860<br>6 | 0.0004384<br>53 |
| NUDT1   | 7,8-dihydro-8-oxoguanine<br>triphosphatase OS=Homo<br>sapiens GN=NUDT1 PE=1<br>SV=3                    | 157.7  | 67.75 | 0.429613<br>2 | 0.0004029<br>84 |
| PODXL   | Podocalyxin OS=Homo<br>sapiens GN=PODXL PE=2<br>SV=1                                                   | 167.6  | 71.65 | 0.427506      | 0.0003720<br>28 |
| TMSB10  | Thymosin beta-10<br>OS=Homo sapiens<br>GN=TMSB10 PE=1 SV=2                                             | 162.4  | 68.75 | 0.423337<br>4 | 0.0003168<br>54 |
| RPL22L1 | 60S ribosomal protein L22-<br>like 1 (Fragment)<br>OS=Homo sapiens<br>GN=RPL22L1 PE=1 SV=1             | 165.4  | 69.95 | 0.422914<br>1 | 0.0003116<br>74 |
| UAP1    | UDP-N-acetylhexosamine<br>pyrophosphorylase<br>OS=Homo sapiens<br>GN=UAP1 PE=1 SV=3                    | 162.85 | 68.6  | 0.421246<br>5 | 0.0002919<br>83 |
| PDLIM4  | PDZ and LIM domain<br>protein 4 OS=Homo<br>sapiens GN=PDLIM4 PE=1<br>SV=2                              | 159.4  | 66.75 | 0.418757<br>8 | 0.0002646<br>23 |
| HMGB2   | High mobility group protein<br>B2 OS=Homo sapiens<br>GN=HMGB2 PE=1 SV=2                                | 160.6  | 67    | 0.417185<br>6 | 0.0002485<br>2  |
| TPM2    | Tropomyosin beta chain<br>OS=Homo sapiens<br>GN=TPM2 PE=1 SV=1                                         | 162.4  | 67.05 | 0.412869<br>5 | 0.0002086<br>57 |
| KRT75   | Keratin, type II cytoskeletal<br>75 OS=Homo sapiens<br>GN=KRT75 PE=1 SV=2                              | 158.6  | 65.35 | 0.412042<br>9 | 0.0002017<br>01 |
| CXorf67 | Uncharacterized protein<br>CXorf67 OS=Homo sapiens                                                     | 163.8  | 67.25 | 0.410561<br>7 | 0.0001897<br>45 |



|             |                                                                                             |        |       |           |             |
|-------------|---------------------------------------------------------------------------------------------|--------|-------|-----------|-------------|
|             | GN=CXorf67 PE=1 SV=1                                                                        |        |       |           |             |
| SLC1A5      | Neutral amino acid transporter B(0) OS=Homo sapiens GN=SLC1A5 PE=1 SV=2                     | 159.1  | 64    | 0.4022627 | 0.000133609 |
| HLA-A       | MHC class I antigen (Fragment) OS=Homo sapiens GN=HLA-A PE=3 SV=1                           | 157.95 | 63.35 | 0.4010763 | 0.000126923 |
| LCP1        | Lymphocyte cytosolic protein 1 (L-plastin), isoform CRA_a OS=Homo sapiens GN=LCP1 PE=4 SV=1 | 155.15 | 61.9  | 0.3989687 | 0.000115774 |
| PROCR       | Endothelial protein C receptor OS=Homo sapiens GN=PROCR PE=1 SV=1                           | 158.6  | 63.1  | 0.3978562 | 0.000110246 |
| hCG_2014768 | HCG2014768, isoform CRA_a OS=Homo sapiens GN=hCG_2014768 PE=4 SV=1                          | 174.75 | 69.4  | 0.3971388 | 0.000106806 |
| RBP1        | Retinol binding protein 1, cellular OS=Homo sapiens GN=RBP1 PE=1 SV=1                       | 166.45 | 65.65 | 0.3944127 | 9.46E-05    |
| GNL3        | Guanine nucleotide-binding protein-like 3 OS=Homo sapiens GN=GNL3 PE=1 SV=2                 | 144.95 | 57    | 0.393239  | 8.97E-05    |
| LGALS1      | Galectin-1 OS=Homo sapiens GN=LGALS1 PE=1 SV=2                                              | 170.45 | 66.45 | 0.3898504 | 7.69E-05    |
| hCG_23833   | HCG23833, isoform CRA_b OS=Homo sapiens GN=hCG_23833 PE=4 SV=1                              | 163.35 | 63.6  | 0.389348  | 7.51E-05    |
| IL8         | Multifunctional fusion protein OS=Homo sapiens GN=IL8 PE=3 SV=1                             | 175.05 | 67.8  | 0.3873179 | 6.84E-05    |
| QPRT        | Nicotinate-nucleotide pyrophosphorylase [carboxylating] OS=Homo sapiens GN=QPRT PE=1 SV=3   | 139.6  | 54    | 0.3868195 | 6.68E-05    |

|        |                                                                                       |        |       |               |          |
|--------|---------------------------------------------------------------------------------------|--------|-------|---------------|----------|
| KCTD14 | BTB/POZ domain-containing protein KCTD14<br>OS=Homo sapiens<br>GN=KCTD14 PE=1 SV=2    | 165.9  | 64.1  | 0.386377<br>3 | 6.55E-05 |
| STMN1  | Stathmin OS=Homo sapiens<br>GN=STMN1 PE=2 SV=1                                        | 170.5  | 65.45 | 0.383871      | 5.82E-05 |
| CRYAB  | Alpha-crystallin B chain<br>OS=Homo sapiens<br>GN=CRYAB PE=1 SV=2                     | 157.7  | 60.15 | 0.381420<br>4 | 5.18E-05 |
| H1FO   | Histone H1.0 OS=Homo sapiens<br>GN=H1FO PE=1 SV=3                                     | 171.5  | 65.3  | 0.380758      | 5.02E-05 |
| PHGDH  | D-3-phosphoglycerate dehydrogenase OS=Homo sapiens<br>GN=PHGDH PE=1 SV=4              | 166.9  | 62.75 | 0.375973<br>6 | 3.97E-05 |
| FGF1   | Fibroblast growth factor 1<br>OS=Homo sapiens<br>GN=FGF1 PE=1 SV=1                    | 156.75 | 58.5  | 0.373205<br>7 | 3.46E-05 |
| CKB    | Creatine kinase brain isoform 2 (Fragment)<br>OS=Homo sapiens<br>GN=CKB PE=2 SV=1     | 169.35 | 60.5  | 0.357248<br>3 | 1.51E-05 |
| YA61   | Drug-sensitive protein 1<br>OS=Homo sapiens<br>GN=YA61 PE=2 SV=1                      | 171.85 | 61.2  | 0.356124<br>5 | 1.42E-05 |
| EEF1D  | Elongation factor 1-delta (Fragment)<br>OS=Homo sapiens<br>GN=EEF1D PE=1 SV=1         | 172.35 | 59    | 0.342326<br>7 | 6.47E-06 |
| MMP3   | Stromelysin-1 OS=Homo sapiens<br>GN=MMP3 PE=1 SV=2                                    | 173.45 | 59.25 | 0.341597      | 6.20E-06 |
| TNC    | TNC variant protein (Fragment)<br>OS=Homo sapiens<br>GN=TNC variant protein PE=2 SV=1 | 171    | 57.55 | 0.336549<br>7 | 4.58E-06 |
| BCAT1  | Branched-chain-amino-acid aminotransferase<br>OS=Homo sapiens<br>GN=BCAT1 PE=3 SV=1   | 177.45 | 59.5  | 0.335305<br>7 | 4.24E-06 |
| DHRS2  | Dehydrogenase/reductase SDR family member 2,                                          | 176.7  | 58.85 | 0.333050<br>4 | 3.69E-06 |

|           |                                                                                          |        |       |           |          |
|-----------|------------------------------------------------------------------------------------------|--------|-------|-----------|----------|
|           | mitochondrial OS=Homo sapiens GN=DHRS2 PE=1 SV=4                                         |        |       |           |          |
| SERPINB11 | Serpin B11 OS=Homo sapiens GN=SERPINB11 PE=1 SV=2                                        | 168    | 55.75 | 0.3318452 | 3.43E-06 |
| NDN       | Necdin OS=Homo sapiens GN=NDN PE=2 SV=1                                                  | 187.85 | 61.55 | 0.327655  | 2.63E-06 |
| S100A2    | Protein S100-A2 OS=Homo sapiens GN=S100A2 PE=1 SV=2                                      | 185    | 60.15 | 0.3251351 | 2.23E-06 |
| TUBB2B    | Tubulin beta-2B chain OS=Homo sapiens GN=TUBB2B PE=1 SV=1                                | 170.2  | 53.45 | 0.3140423 | 1.06E-06 |
| FLNC      | Filamin-C OS=Homo sapiens GN=FLNC PE=1 SV=3                                              | 180.7  | 56.45 | 0.3123962 | 9.49E-07 |
| GSTZ1     | Maleylacetoacetate isomerase OS=Homo sapiens GN=GSTZ1 PE=1 SV=3                          | 184.55 | 57.25 | 0.310214  | 8.14E-07 |
| PHF15     | PHD finger protein 15, isoform CRA_a OS=Homo sapiens GN=PHF15 PE=2 SV=1                  | 183.65 | 55.2  | 0.3005717 | 4.04E-07 |
| MTAP      | S-methyl-5'-thioadenosine phosphorylase OS=Homo sapiens GN=MTAP PE=4 SV=1                | 182.05 | 53.45 | 0.2936007 | 2.37E-07 |
| CCNB1     | G2/mitotic-specific cyclin-B1 OS=Homo sapiens GN=CCNB1 PE=1 SV=1                         | 185.1  | 52    | 0.2809292 | 8.48E-08 |
| IGF2BP2   | Insulin-like growth factor 2 mRNA-binding protein 2 OS=Homo sapiens GN=IGF2BP2 PE=1 SV=1 | 188.95 | 52.25 | 0.2765282 | 5.82E-08 |
| KRT17     | Keratin, type I cytoskeletal 17 OS=Homo sapiens GN=KRT17 PE=1 SV=2                       | 188.8  | 51.5  | 0.2727754 | 4.19E-08 |
| CSTA      | Cystatin-A OS=Homo sapiens GN=CSTA PE=1 SV=1                                             | 191.55 | 49.25 | 0.257113  | 9.71E-09 |
| PTX3      | Pentraxin-related protein PTX3 OS=Homo sapiens                                           | 192.75 | 48.3  | 0.2505837 | 5.04E-09 |

|          |                                                                                              |        |       |           |          |
|----------|----------------------------------------------------------------------------------------------|--------|-------|-----------|----------|
|          | GN=PTX3 PE=1 SV=3                                                                            |        |       |           |          |
| HIST1H1A | Histone H1.1 OS=Homo sapiens GN=HIST1H1A PE=1 SV=3                                           | 203.1  | 46.95 | 0.2311669 | 5.97E-10 |
| PLEKHH2  | Pleckstrin homology domain-containing family H member 2 OS=Homo sapiens GN=PLEKHH2 PE=1 SV=2 | 203.25 | 44.4  | 0.2184502 | 1.25E-10 |
| MTAP     | Purine nucleoside phosphorylase OS=Homo sapiens GN=MTAP PE=2 SV=1                            | 203.35 | 42.9  | 0.2109663 | 4.63E-11 |
| S100A2   | Protein S100-A2 OS=Homo sapiens GN=S100A2 PE=1 SV=3                                          | 209.9  | 36.55 | 0.1741305 | 1.32E-13 |
| HEL-S-2a | Epididymis secretory sperm binding protein Li 2a OS=Homo sapiens GN=HEL-S-2a PE=2 SV=1       | 229.1  | 34.45 | 0.150371  | 9.59E-16 |

**Table S2.** shRNA or siRNA sequences used throughout this study.

| <b>Gene</b>             |         | <b>Sequences</b>                  |
|-------------------------|---------|-----------------------------------|
| <b>pro-SFTP</b>         | shRNA#1 | 5'- CAGACTGACTCAAACGGCATCTGTA -3' |
|                         |         | 5'- TACAGATGCCGTTTGAGTCAGTCTG -3' |
|                         | shRNA#2 | 5'- CACAGGATCTCTCCGAGCAGCAATT -3' |
|                         |         | 5'- AATTGCTGCTCGGAGAGATCCTGTG -3' |
|                         | shRNA#3 | 5'- TGCAAGCAATTTGTGGAGCAGCACA -3' |
|                         |         | 5'- TGTGCTGCTCCACAAATTGCTTGCA -3' |
| <b>Scramble</b>         | shRNA   | 5'- TTCTCCGAACGTGTCACGTAA -3'     |
|                         |         | 5'- TTACGTGACACGTTCCGGAGAA -3'    |
| <b>ADRM1</b>            | siRNA#1 | 5'- GACGACUCGCUUAUUCACU -3'       |
|                         |         | 5'- AGUGAAUAAGCGAGUCGUC -3'       |
|                         | siRNA#2 | 5'- GCUUCCUACUUGCCAUCU -3'        |
|                         |         | 5'- AGAUGGCAAGUAGGGAAGC -3'       |
|                         | siRNA#3 | 5'- CAUGCAGCUCAUCGGACCA -3'       |
|                         |         | 5'- UGUCCGAUGAGCUGCAUG -3'        |
| <b>siUCH37</b>          | siRNA#1 | 5'- CAUUUAGGCGAGACAUAU -3'        |
|                         |         | 5'- AUA AUGUCUCGCCUAAAUG -3'      |
|                         | siRNA#2 | 5'- GCUCAUUAAGGAUUCGGU -3'        |
|                         |         | 5'- ACCGAAUCCUUUAUGAGC -3'        |
|                         | siRNA#3 | 5'- CCAGCAGUUAUACCACUA -3'        |
|                         |         | 5'- UAGUGGUAUUAACUGCUGG -3'       |
| <b>siPGK1</b>           | siRNA#1 | 5'- CCAAGUCGGUAGUCCUUAU -3'       |
|                         |         | 5'- AUAAGGACUACCGACUUGG -3'       |
|                         | siRNA#2 | 5'- GUCGUUAUGAGAGUCGACU -3'       |
|                         |         | 5'- AGUCGACUCUCAUACGAC -3'        |
|                         | siRNA#3 | 5'- CCAAGAUUGUCAAGACCU -3'        |
|                         |         | 5'- AGGUCUUUGACAAUCUUGG -3'       |
| <b>Negative control</b> | siRNA   | 5'- UUCUCCGAACGUGUCACGU -3'       |
|                         |         | 5'- ACGUGACACGUUCGGAGAA -3'       |

**Table S3** Characteristics of patients with early-stage lung adenocarcinoma (For IHC)

| Variable                 | Total<br>(n=160) | SFTPb expression levels |            | <i>p</i> |
|--------------------------|------------------|-------------------------|------------|----------|
|                          |                  | Normal (n=72)           | Low (n=88) |          |
| <b>Gender</b>            |                  |                         |            | 0.78     |
| Female                   | 78               | 36                      | 42         |          |
| Male                     | 82               | 36                      | 46         |          |
| <b>Age</b>               |                  |                         |            | 0.94     |
| 60≤                      | 85               | 38                      | 47         |          |
| 60>                      | 75               | 34                      | 41         |          |
| <b>Stage</b>             |                  |                         |            | 0.13     |
| I                        | 145              | 68                      | 77         |          |
| II                       | 15               | 4                       | 11         |          |
| <b>Smoking status</b>    |                  |                         |            | 0.46     |
| NO                       | 104              | 49                      | 55         |          |
| Yes                      | 56               | 23                      | 33         |          |
| <b>Recurrence status</b> |                  |                         |            | 0.002    |
| Recurrence               | 90               | 31                      | 59         |          |
| Non-recurrence           | 70               | 41                      | 29         |          |
| <b>PGK1</b>              |                  |                         |            | 0.004    |
| High                     | 89               | 31                      | 58         |          |
| Low                      | 71               | 41                      | 30         |          |
| <b>p-AKT</b>             |                  |                         |            | 0.002    |
| High                     | 95               | 33                      | 62         |          |
| Low                      | 65               | 39                      | 26         |          |

**Table S4** Characteristics of patients with early-stage lung adenocarcinoma (for serum)

| Variable                 | Total<br>(n=160) | SFTPb expression levels |            | <i>p</i> |
|--------------------------|------------------|-------------------------|------------|----------|
|                          |                  | Normal (n=113)          | Low (n=24) |          |
| <b>Gender</b>            |                  |                         |            | 0.17     |
| Female                   | 45               | 40                      | 5          |          |
| Male                     | 92               | 73                      | 19         |          |
| <b>Age</b>               |                  |                         |            | 0.27     |
| 60≤                      | 66               | 52                      | 14         |          |
| 60>                      | 71               | 61                      | 10         |          |
| <b>Stage</b>             |                  |                         |            | 0.27     |
| I                        | 93               | 79                      | 14         |          |
| II                       | 44               | 34                      | 10         |          |
| <b>Recurrence status</b> |                  |                         |            | 0.00     |
| Recurrence               | 57               | 39                      | 18         |          |
| Non-recurrence           | 80               | 74                      | 6          |          |
